# Supplementary material
Source: publisher figshare collection journal article supplement (https://sage.figshare.com/ndownloader/files/13276763)
Supplement: Supplementary file 1 [file 13276763]

**Supplementary material 3.** Prevalence and Odds Ratios (OR) of mortality for all possible pairs of multimorbidity

| Diagnosis group* | LUNG | MUSCULO-  SKELETAL | ENDO | MENTAL | CANCER | NEURO | GASTRO | HEART | KIDNEY | SENSORY |
| --- | --- | --- | --- | --- | --- | --- | --- | --- | --- | --- |
| ONLY ONE DIAGNOSIS GROUP | *45.893 (1.2%)* | *181.159 (4.5%)* | *42.735 (1.1%)* | *114.479 (2.9%)* | *72.296 (1.8%)* | *54.043 (1.4%)* | *53.579 (1.3%)* | *98.103 (2.5%)* | *19.306 (0.5%)* | *77.589 (2.0%)* |
| 2.56†  [2.50-2.63] | 1.10  [1.08-1.12] | 2.12  [2.07-2.18] | 2.38  [2.33-2.42] | 2.68  [2.63-2.74] | 2.52  [2.46-2.58] | 1.32  [1.28-1.36] | 1.91  [1.88-1.94] | 1.38  [1.32-1.45] | 1.29  [1.26-1.31] |
| LUNG |  | *5.891 (0.2%)* | *1.806 (0.05%)* | *3.592 (0.1%)* | *1.913 (0.05%)* | *1.714 (0.04%)* | *1.894 (0.05%)* | *9.258 (0.2%)* | *680 (0.02%)* | *2.636 (0.07%)* |
|  | 2.99  [2.80-3.19] | 4.58  [4.06-5.16] | 4.86  [4.47-5.28] | 5.59  [4.93-6.34] | 4.94  [4.33-5.64] | 3.52  [3.13-3.95] | 5.75  [5.42-6.10] | 3.40  [2.80-4.13] | 3.38  [3.03-3.77] |
| MUSCULO-  SKELETAL |  |  | *5.580 (0.1%)* | *10.737 (0.3%)* | *6.540 (0.2%)* | *6.598 (0.2%)* | *7.380 (0.2%)* | *16.001 (0.4%)* | *2.845 (0.07%)* | *12.109 (0.3%)* |
|  |  | 1.99  [1.86-2.13] | 2.31  [2.19-2.43] | 2.66  [2.49-2.84] | 2.56  [2.40-2.74] | 1.37  [1.29-1.46] | 2.03  [1.95-2.11] | 1.45  [1.31-1.61] | 1.42  [1.35-1.49] |
| ENDO |  |  |  | *3.670 (0.1%)* | *1.898 (0.05%)* | *3.534 (0.1%)* | *2.294 (0.06%)* | *10.890 (0.3%)* | *836 (0.02%)* | *2.998 (0.1%)* |
|  |  |  | 4.49  [4.14-4.87] | 4.26  [3.78-4.80] | 5.94  [5.42-6.50] | 3.54  [3.20-3.91] | 4.27  [4.06-4.49] | 5.31  [4.48-6.29] | 2.87  [2.59-3.17] |
| MENTAL |  |  |  |  | *3.553 (0.1%)* | *8.848 (0.2%)* | *6.745 (0.2%)* | *6.011 (0.2%)* | *1.378 (0.03%)* | *4.274 (0.1%)* |
|  |  |  |  | 4.22  [3.86-4.61] | 4.89  [4.63-5.16] | 5.08  [4.79-5.38] | 3.57  [3.33-3.81] | 2.73  [2.37-3.13] | 3.23  [2.95-3.52] |
| CANCER |  |  |  |  |  | *2.708 (0.07%)* | *2.039 (0.05%)* | *4.671 (0.1%)* | *1.048 (0.03%)* | *4.365 (0.1%)* |
|  |  |  |  |  | 6.35  [5.71-7.06] | 3.77  [3.36-4.24] | 4.43  [4.07-4.81] | 3.00  [2.53-3.55] | 2.90  [2.65-3.17] |
| NEURO |  |  |  |  |  |  | *1.698 (0.04%)* | *9.421 (0.2%)* | *912 (0.02%)* | *4.060 (0.1%)* |
|  |  |  |  |  |  | 2.84  [2.50-3.22] | 4.29  [4.04-4.55] | 3.65  [3.07-4.34] | 3.19  [2.89-3.51] |
| GASTRO |  |  |  |  |  |  |  | *4.415 (0.1%)* | *849 (0.02%)* | *2.181 (0.05%)* |
|  |  |  |  |  |  |  | 1.74  [1.61-1.87] | 1.79  [1.46-2.18] | 1.52  [1.36-1.70] |
| HEART |  |  |  |  |  |  |  |  | *1.609 (0.04%)* | *11.118 (0.3%)* |
|  |  |  |  |  |  |  |  | 4.09  [3.59-4.66] | 2.15  [2.04-2.28] |
| KIDNEY |  |  |  |  |  |  |  |  |  | *899 (0.02%)* |
|  |  |  |  |  |  |  |  |  | 1.84  [1.54-2.21] |

Prevalence is presented as numbers (N) and percentages (%).

*LUNG = lung diagnoses, MUSCULOSKELETAL = musculoskeletal diagnoses, ENDO = endocrine diagnoses, MENTAL = mental diagnoses, CANCER = cancer diagnoses, NEURO = neurological diagnoses, GASTRO = gastrointestinal diagnoses, HEART = cardiovascular diagnoses, KIDNEY = genitourinary diagnoses, SENSORY = sensory organ diagnoses

†Odds Ratios for mortality for all combinations of two diagnosis groups compared to persons without any chronic diagnose, calculated with logistic regression, presented with 95% confidence intervals. All analyses are adjusted for age, sex, socioeconomic status (education, income, working status, and assets), and degree of urbanisation and cohabitation status.
